# Supplementary material for: Highly enantioselective tandem enzyme–organocatalyst crossed aldol reactions with acetaldehyde in deep-eutectic-solvents
Source: Royal Society of Chemistry journal article supplement (doi:10.1039/c4ra09307k), 2014-09-16
Supplement: c4ra09307k1.pdf [file c4ra09307k1.pdf]

**Highly enantioselective tandem enzyme-organocatalyst crossed aldol reactions  
with acetaldehyde in deep-eutectic-solvents.**

Christoph R. Müller<sup>a</sup>, Isabell Meiners<sup>a</sup>, Pablo Domínguez de María<sup>a,b\*</sup>

<sup>a</sup> Institut für Technische und Makromolekulare Chemie (ITMC),  
RWTH Aachen University. Worringerweg 1. 52074 Aachen, Germany.

<sup>b</sup> Present address: Sustainable Momentum, SL Ap. Correos 3517. 35004, Las Palmas  
de Gran Canaria, Canary Islands, Spain.

**SUPPLEMENTARY INFORMATION**

## 1. Experimental

*Chemicals.* All chemicals were obtained by Sigma-Aldrich and used without further purification. Immo-CAL-B was delivered by c-LEcta GmbH.

*NMR-Spectroscopy.* All NMR spectra were measured on a 300 MHz ( $^1\text{H}$ -NMR: 300 MHz,  $^{13}\text{C}$ -NMR: 75 MHz) Bruker device from BioSpin GmbH at 23 °C. Chemical shifts are relative to the used solvents ( $\text{CDCl}_3$  :  $^1\text{H}$ :  $\delta = 7.26$  ppm,  $^{13}\text{C}$ :  $\delta = 77.36$  ppm), indicated in ppm.

### *Preparation of glycerol-choline chloride (2:1) DES:*

Glycerol (61.3 g, 66.6 mmol) and choline chloride (46.3 g, 33.2 mmol) were mixed and stirred at 60 °C until a clear solution was obtained.

### *General procedure 1:*

The enzyme CAL-B (3.0 mg) was added to a mixture of aromatic aldehyde (1.00 mmol), vinyl acetate (276  $\mu\text{L}$ , 3.00 mmol), 2-propanol (230  $\mu\text{L}$ , 3.00 mmol), DES (glycerol:choline chloride 2:1, 1 mL) and (*S*)-(bis(3,5-bis(trifluoromethyl)phenyl)(pyrrolidin-2-yl)methanol (**6**, 105.2 mg, 0.20 mmol). After 48 h of stirring at room temperature, Methanol was added (2.0 mL) and the mixture was cooled down to 0 °C, followed by a slow addition of  $\text{NaBH}_4$  (227 mg, 6.00 mmol). The reaction was quenched after 1 h at 0 °C by the addition of 2 mL water. The aqueous phase was extracted with ethyl acetate (3 x 2 mL) and the combined organic layers were washed with brine (2 mL). After drying over  $\text{Na}_2\text{SO}_4$ , filtration and removal of the solvent in vacuum, the raw product was obtained. Purification was performed *via* flash chromatography over silica gel.

*General procedure 2 - racemates:*

The enzyme CAL-B (3.0 mg) was added to a mixture of aromatic aldehyde (1.00 mmol), vinyl acetate (276  $\mu$ L, 3.00 mmol), 2-propanol (230  $\mu$ L, 3.00 mmol), DES (glycerol:choline chloride 2:1, 1 mL) and triethylamine (28  $\mu$ L, 0.20 mmol). After 48 h stirring at room temperature, Methanol was added (2.0 mL) and the mixture was cooled down to 0 °C, followed by a slow addition of NaBH<sub>4</sub> (226 mg, 6.0 mmol). The reaction was quenched after 1 h at 0 °C by the addition of 2 mL water. The aqueous phase was extracted with ethyl acetate (3 x 2 mL) and the combined organic layers were washed with brine (2 mL). After drying over Na<sub>2</sub>SO<sub>4</sub>, filtration and removal of the solvent in vacuum, the raw product was obtained. Purification was performed *via* flash chromatography over silica gel.

**(R)-1-(4-nitrophenyl)propane-1,3-diol (3a):**

By following *general procedure 1*, 4-nitrobenzaldehyde (151.1 mg, 1.00 mmol) was converted. After work-up and purification *via* flash chromatography over silica gel (eluent: 4:1 ethyl acetate/petroleum ether), 137.1 mg (0.70 mmol, 70% yield) of the desired product were obtained as colorless oil.

R<sub>f</sub> = 0.33 (eluent: 4:1 ethyl acetate/petroleum ether)

<sup>1</sup>H-NMR (CDCl<sub>3</sub>, 300 MHz):  $\delta$  = 1.97 (q,  $J$  = 5.8 Hz, 2H), 2.18 (brs, 1H), 3.50 (d,  $J$  = 2.9 Hz, 1H), 3.90 – 3.95 (m, 2H), 5.10 (t,  $J$  = 6.00 Hz, 1H), 7.55 (d,  $J$  = 8.8 Hz, 2H), 8.21 (d,  $J$  = 8.8 Hz, 2H) ppm.

<sup>13</sup>C-NMR (CDCl<sub>3</sub>, 75 MHz):  $\delta$  = 40.6, 61.7, 73.7, 124.1, 126.8, 147.6, 152.1 ppm.

The analytical data agree with those reported in literature.<sup>1</sup>

HPLC: column: Phenomenex-Lux-Cellulose-3, eluent: hexane/*iso*-propanol 90:10, detection at 270 nm, retention time of (R)-1-(4-nitrophenyl)propane-1,3-diol: 40.71 min, (S)-1-(4-nitrophenyl)propane-1,3-diol: 50.75 min

### **(R)-1-(3-nitrophenyl)propane-1,3-diol (3b):**

By following *general procedure 1*, 3-nitrobenzaldehyde (151.1 mg, 1.00 mmol) was converted. After work-up and purification *via* flash chromatography over silica gel (eluent: 1:1 ethyl acetate/petroleum ether), 45.5 mg (0.23 mmol, 23% yield) of the desired product were obtained as yellowish oil.

$R_f$  = 0.13 (eluent: 1:1 ethyl acetate/petroleum ether)

$^1\text{H-NMR}$  ( $\text{CDCl}_3$ , 300 MHz):  $\delta$  = 1.94-2.00(m, 2H), 2.66 (brs, 1H), 3.89 (t,  $J$  = 5.4 Hz, 2H), 5.08 (t,  $J$  = 6.2 Hz, 1H), 7.51 (t,  $J$  = 7.9 Hz, 1H), 7.70 (d,  $J$  = 7.6 Hz, 1H), 8.09-8.13 (m, 1H), 8.23 (t,  $J$  = 1.7 Hz, 1H) ppm.

$^{13}\text{C-NMR}$  ( $\text{CDCl}_3$ , 75 MHz):  $\delta$  = 40.6, 61.5, 73.4, 121.0, 122.7, 129.7, 132.1, 146.9, 148.7 ppm.

The analytical data agree with those reported in literature.<sup>1</sup>

HPLC: column: Lux-Cellulose-3, eluent: hexane/*iso*-propanol 95:5, detection at 270 nm, retention time of (*R*)-1-(3-nitrophenyl)propane-1,3-diol: 89.758 min, (*S*)-1-(3-nitrophenyl)propane-1,3-diol: 96.067 min

### **(R)-1-(2-nitrophenyl)propane-1,3-diol (3c):**

By following *general procedure 1*, 2-nitrobenzaldehyde (151.1 mg, 1.00 mmol) was converted. After work-up and purification *via* flash chromatography over silica gel (eluent: 1:1 ethyl acetate/petroleum ether), 129.0 mg (0.65 mmol, 65% yield) of the desired product were obtained as yellowish oil.

$R_f$  = 0.27 (eluent: 1:1 ethyl acetate/petroleum ether)

$^1\text{H-NMR}$  ( $\text{CDCl}_3$ , 300 MHz):  $\delta$  = 1.88-2.00 (m, 1H), 2.03-2.13 (m, 1H), 2.70 (brs, 1H) 3.87-4.00 (m, 3H), 5.48 (dd,  $J$  = 8.8 Hz, 1.7 Hz, 1H), 7.38-7.44 (m, 1H), 7.62-7.68 (m, 1H), 7.87-7.93 (m, 2H) ppm.

$^{13}\text{C-NMR}$  ( $\text{CDCl}_3$ , 75 MHz):  $\delta$  = 39.8, 62.1, 70.0, 124.7, 128.4, 128.5, 134.0, 140.2, 147.7 ppm.

The analytical data agree with those reported in literature.<sup>1</sup>

HPLC: column: OJ-H Nov. 2003 without precolumn, eluent: hexane/*iso*-propanol 98:2, flow rate: 0.6 mL/min, detection at 210 nm, retention time of (*R*)-1-(2-nitrophenyl)propane-1,3-diol: 143.133 min, (*S*)-1-(2-nitrophenyl)propane-1,3-diol: 155.133 min

**(*R*)-1-(2-chlorophenyl)propane-1,3-diol (3d):**

By following *general procedure 1*, 2-chlorobenzaldehyde (140.6 mg, 1.00 mmol) was converted. After work-up and purification *via* flash chromatography over silica gel (eluent: 1:3 ethyl acetate/petroleum ether), 65.9 mg (0.35 mmol, 35% yield) of the desired product were obtained as yellowish oil.

$R_f$  = 0.19 (eluent: 1:3 ethyl acetate/petroleum ether)

$^1\text{H-NMR}$  ( $\text{CDCl}_3$ , 300 MHz):  $\delta$  = 1.87-2.03 (1H, m), 2.07-2.13 (1H, m), 3.01 (1H, br-s), 3.88-3.98 (2H, m), 5.37 (1H, dd,  $J$  = 2.9, 8.9 Hz), 7.20-7.24 (1H, m), 7.28-7.35 (2H, m), 7.62-7.66 (1H, m) ppm.

$^{13}\text{C-NMR}$  ( $\text{CDCl}_3$ , 75 MHz):  $\delta$  = 37.2, 62.0, 71.3, 127.2, 127.3, 128.6, 129.5, 131.0 ppm.

The analytical data agree with those reported in literature.<sup>1</sup>

HPLC: column: OJ-H Nov. 2003 without precolumn, eluent: hexane/ethanol 98:2, detection at 215 nm, retention time of (*R*)-1-(2-chlorophenyl)propane-1,3-diol: 68.933 min, (*S*)-1-(2-chlorophenyl)propane-1,3-diol: 72.708 min

**(*R*)-1-(2,6-dichlorophenyl)propane-1,3-diol (3e):**

By following *general procedure 1*, 2,6-dichlorobenzaldehyde (175.0 mg, 1.00 mmol) was converted. After work-up and purification *via* flash chromatography over silica gel (eluent: 1:2 ethyl acetate/petroleum ether), 116.3 mg (0.53 mmol, 53% yield) of the desired product were obtained as a white solid.

$R_f$  = 0.19 (eluent: 1:2 ethyl acetate/petroleum ether)

<sup>1</sup>H-NMR (CDCl<sub>3</sub>, 300 MHz): δ = 1.89-1.99 (1H, m), 2.33 (brs, 1H), 2.39-2.51 (m, 1H), 3.31 (d, J = 8.8 Hz, 1H), 3.91 (t, J = 5.8 Hz, 2 H), 5.67 (td, J = 8.8 Hz, 3.71 Hz, 1 H), 7.13 (dd, J = 8.7 Hz, 7.4 Hz, 1H), 7.27 -7.31 (m, 2H) ppm.

<sup>13</sup>C-NMR (CDCl<sub>3</sub>, 75 MHz): δ = 37.4, 61.3, 71.2, 129.3, 129.8, 134.5, 137.7 ppm.

The analytical data agree with those reported in literature.<sup>1</sup>

HPLC: column: OJ-H Nov. 03 without precolumn, eluent: hexane/*iso*-propanol 95:5, detection at 210 nm, retention time of (*R*)-1-(2,6-dichlorophenyl)propane-1,3-diol: 42.947 min, (*S*)-1-(2,6-dichlorophenyl)propane-1,3-diol: 48.080 min

**(*R,Z*)-4-bromo-5-phenylpent-4-ene-1,3-diol (3f):**

By following *general procedure 1*, α-bromocinnamaldehyde (211.1 mg, 1.00 mmol) was converted. After work-up and purification *via* flash chromatography over silica gel (eluent: 1:2 ethyl acetate/petroleum ether), 36.1 mg (0.14 mmol, 14% yield) of the desired product were obtained as a yellowish oil.

R<sub>f</sub> = 0.14 (eluent: 1:2 ethyl acetate/petroleum ether)

<sup>1</sup>H-NMR (CDCl<sub>3</sub>, 300 MHz): δ = 2.04-2.11 (m, 2H), 2.20 (br-s, 1H), 3.23 (d, J = 3.2 Hz.), 3.83-3.98 (m, 2H), 4.58 (m, 1H), 7.18 (s, 1H), 7.28-7.40 (m, 3H), 7.60-7.63 (m, 2H) ppm.

<sup>13</sup>C-NMR (CDCl<sub>3</sub>, 75 MHz): δ = 37.5, 61.0, 77.2, 77.6, 128.1, 128.5, 129.3, 129.4, 135.4 ppm.

The analytical data agree with those reported in literature.<sup>1</sup>

HPLC: column: OJ-H Nov. 03 without precolumn, eluent: hexane/*iso*-propanol 95:5, detection at 210 nm, retention time of (*R,Z*)-4-bromo-5-phenylpent-4-ene-1,3-diol: 111.083 min, (*S,Z*)-4-bromo-5-phenylpent-4-ene-1,3-diol: 116.558 min

## 2. Tandem reaction optimization.

### 2.1. Influence of Solvents

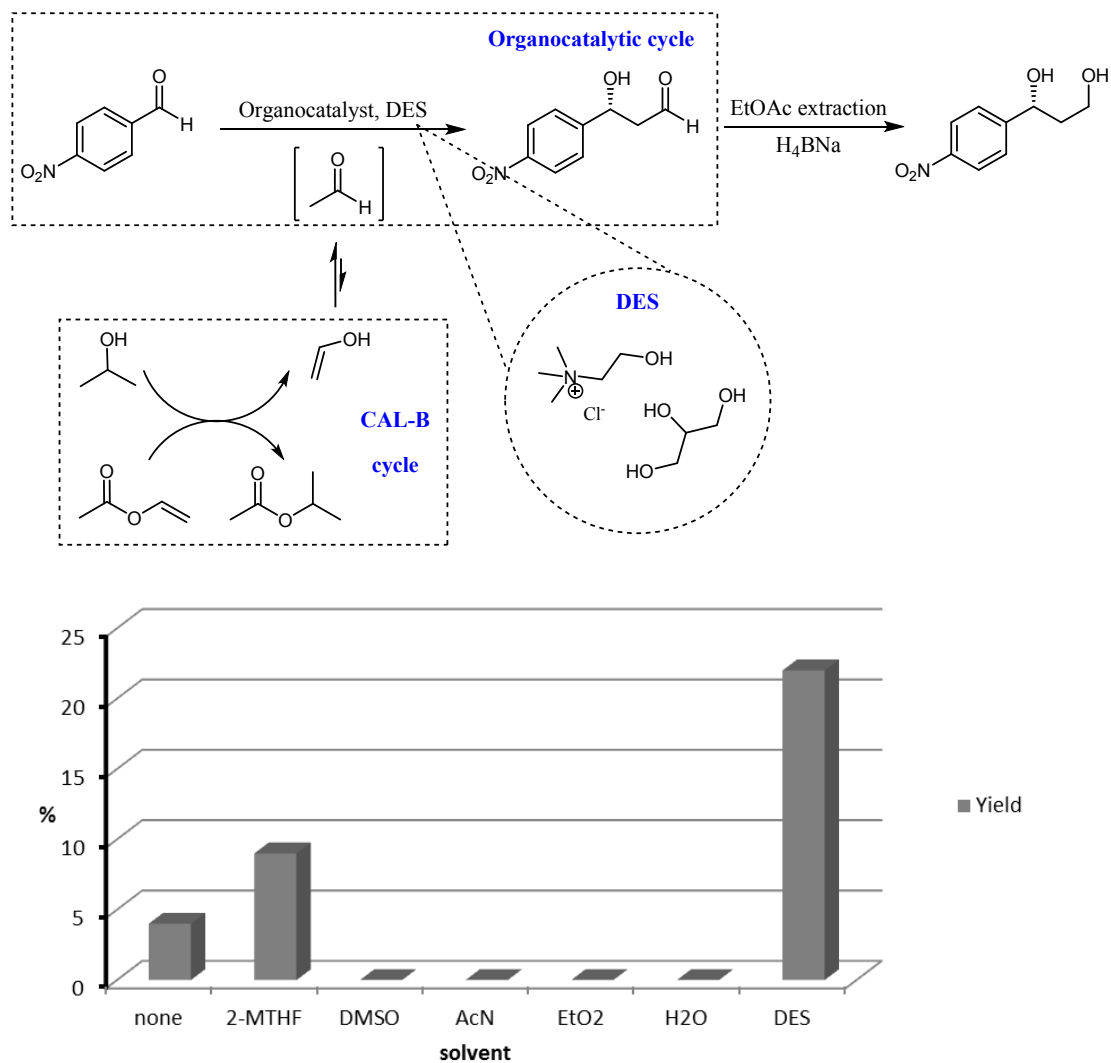

**Figure 1.** Influence of solvent. Conditions: 1.) 1 mmol *p*-nitrobenzaldehyde, 3 mmol vinyl acetate, 3 mmol *iso*-propanol, 0.2 mmol catalyst **6**, 1 mg CAL-B, 1 mL solvent, 48 h, rt; 2.) 6 mmol  $NaBH_4$ , 2 mL methanol, 1 h, 0 °C.

## 2.2. Influence of CAL-B loading

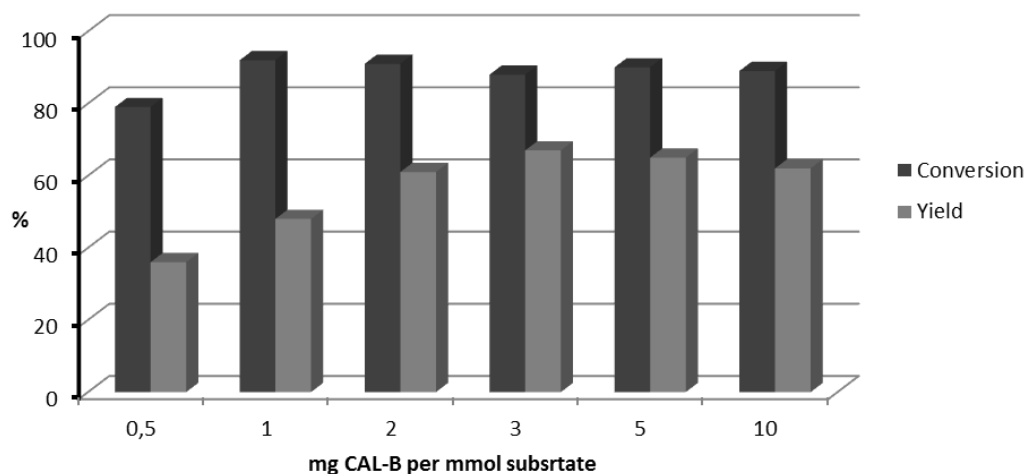

**Figure 2.** Controlling of *in-situ* available acetaldehyde via variation of biocatalyst loading. Conditions: 1.) 1 mmol *p*-nitrobenzaldehyde, 3 mmol vinyl acetate, 3 mmol *iso*-propanol, 0.2 mmol catalyst **6**, CAL-B, 1 mL glycerol-choline chloride (2:1) DES, 48 h, rt; 2.) 6 mmol NaBH<sub>4</sub>, 2 mL methanol, 1 h, 0 °C.

## 2.3. Influence of vinyl acetate – isopropanol ratios

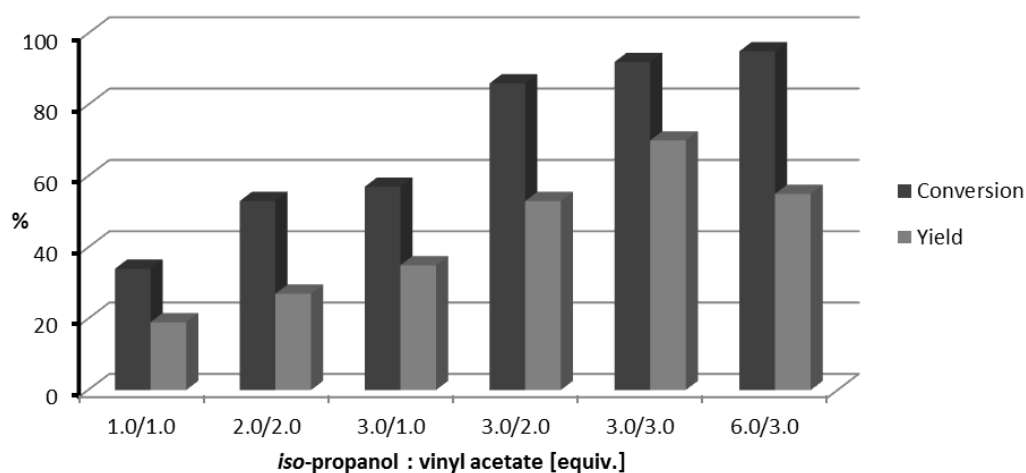

**Figure 3.** Variation of substrate loadings. Conditions: 1.) 1 mmol *p*-nitrobenzaldehyde, vinyl acetate, *iso*-propanol, 0.2 mmol catalyst **6**, CAL-B, 1 mL glycerol-choline chloride (2:1) DES, 48 h, rt; 2.) 6 mmol NaBH<sub>4</sub>, 2 mL methanol, 1 h, 0 °C.



## 2.4. Influence of temperature

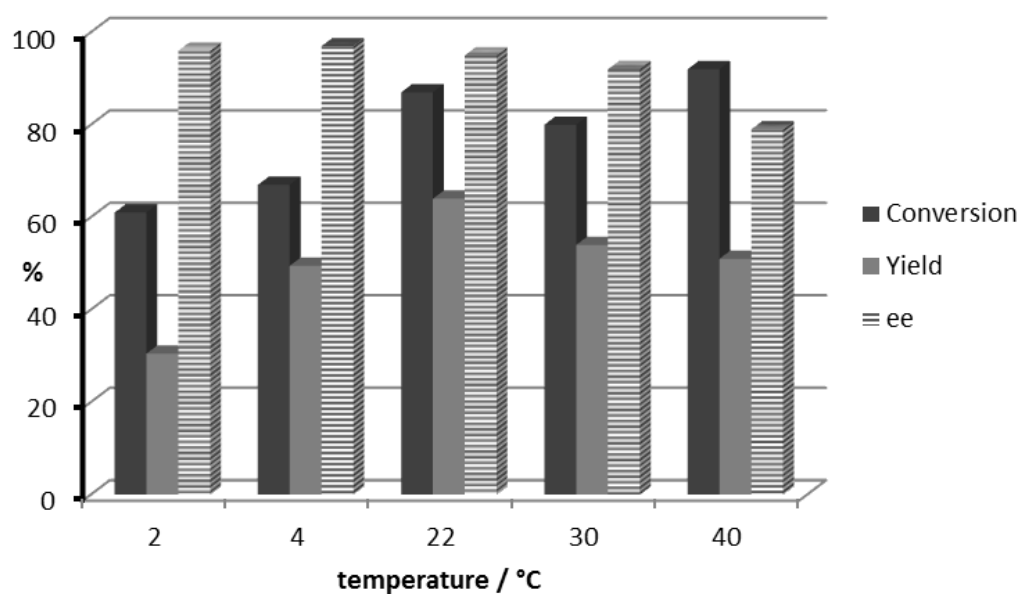

**Figure 4.** Temperature Screening Conditions: 1.) 1 mmol *p*-nitrobenzaldehyde, 3 mmol vinyl acetate, 3 mmol *iso*-propanol, 0.2 mmol catalyst **6**, 1 mg CAL-B, 1 mL glycerol-choline chloride (2:1) DES, 48 h; 2.) 6 mmol NaBH<sub>4</sub>, 2 mL methanol, 1 h, 0 °C.

## 2.5. Influence of organocatalyst

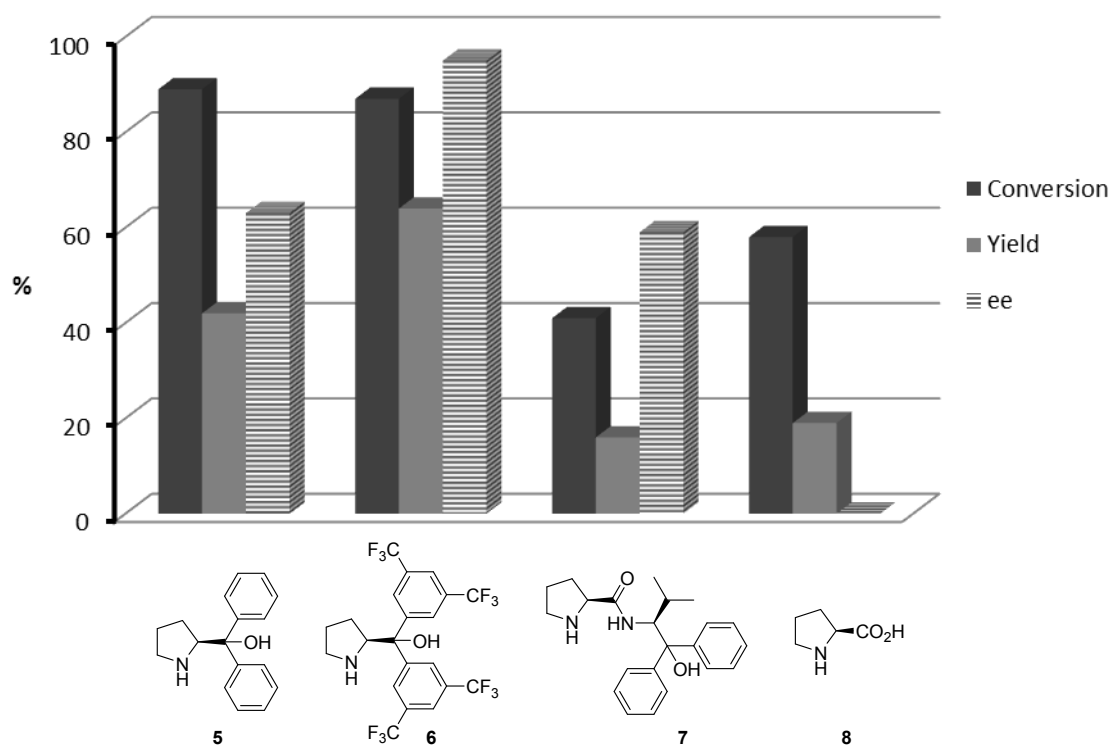

**Figure 5.** Assessment of different organocatalysts in the tandem reaction in DES media. Conditions: 1.) 1 mmol *p*-nitrobenzaldehyde, 3 mmol vinyl acetate, 3 mmol *iso*-propanol, 0.2 mmol catalyst, 1 mg CAL-B, 1 mL glycerol-choline chloride (2:1) DES, 48 h, rt; 2.) 6 mmol NaBH<sub>4</sub>, 2 mL methanol, 1 h, 0 °C.

### 3. Analytics

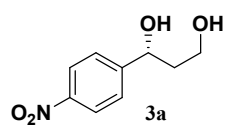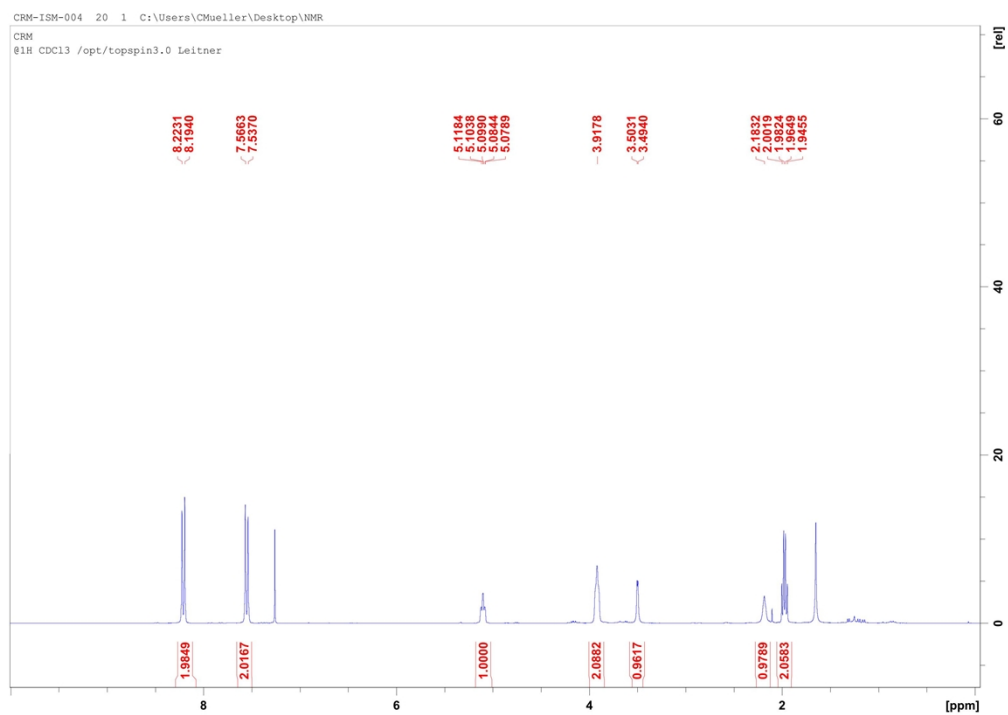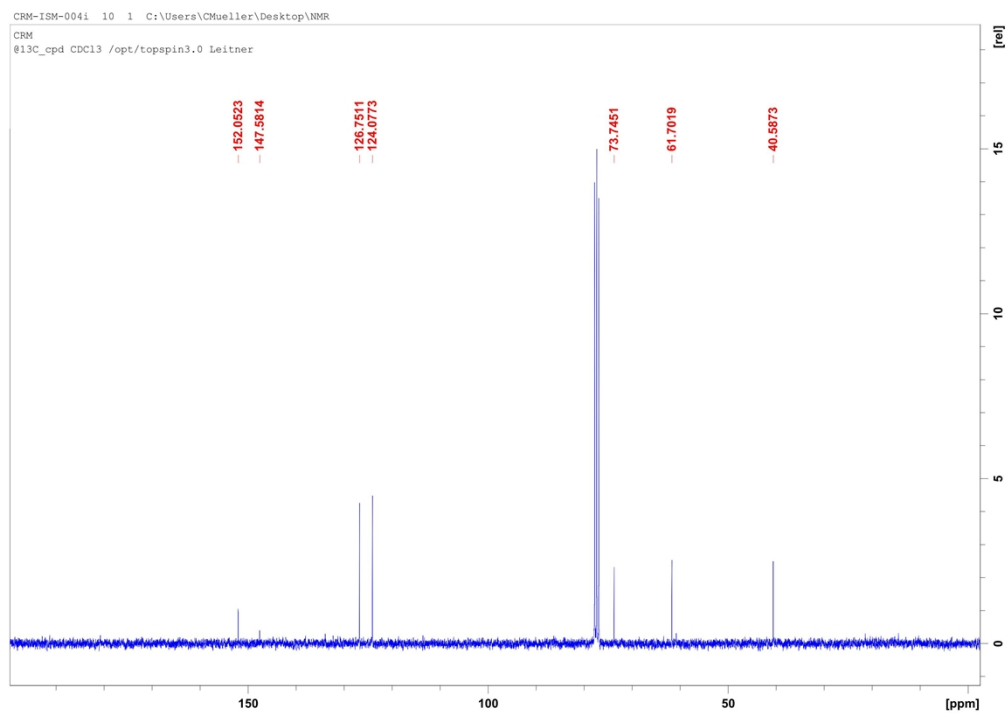

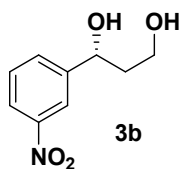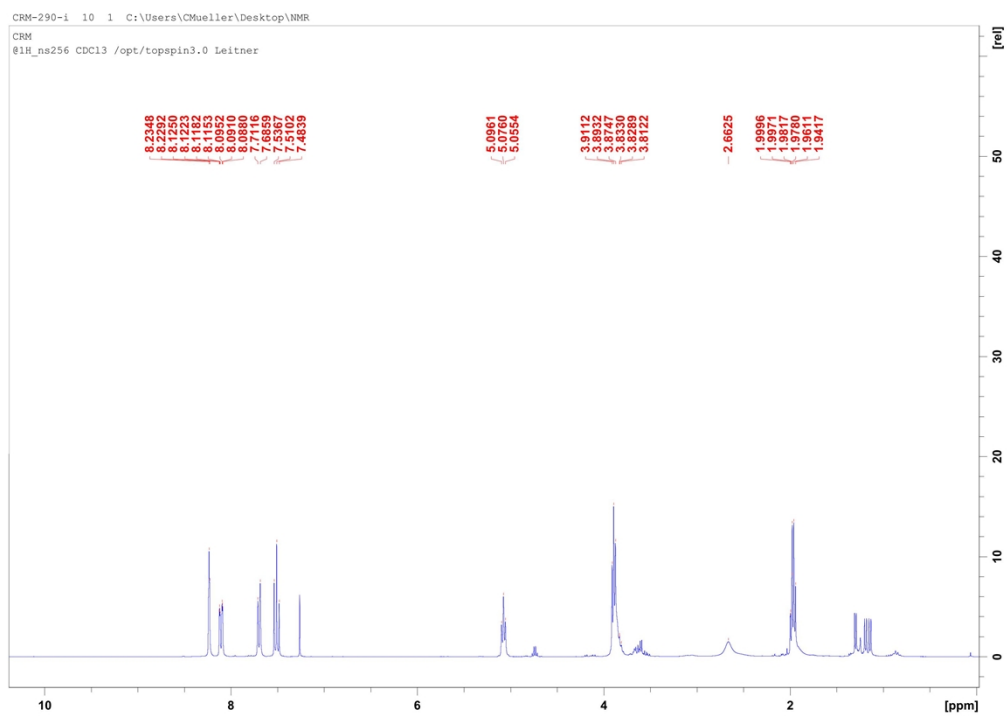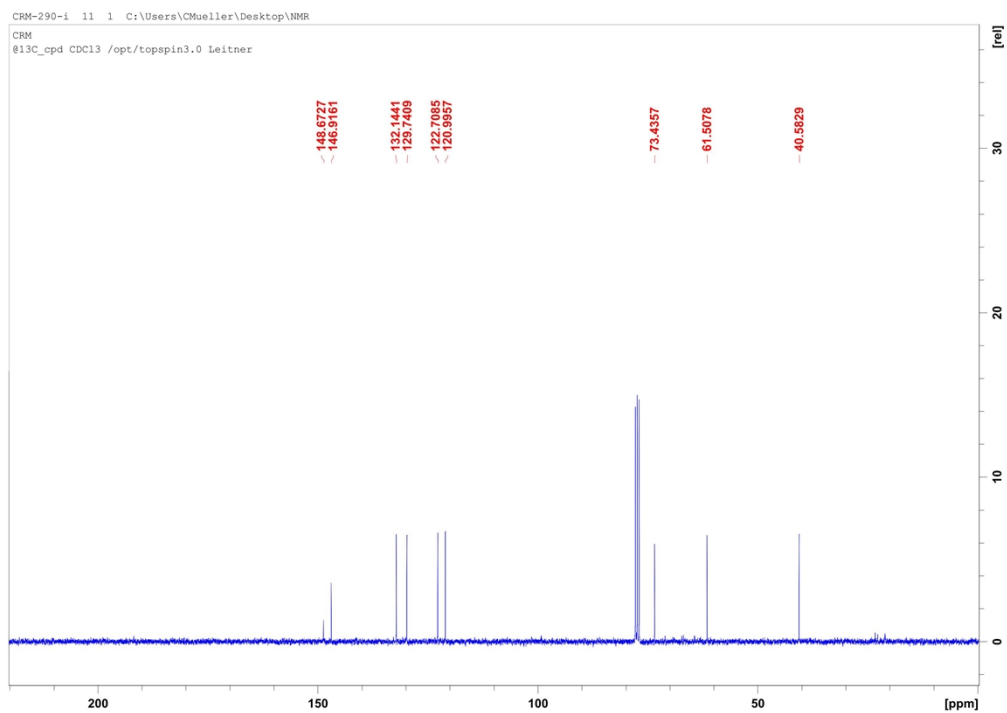

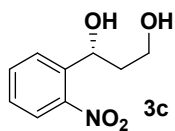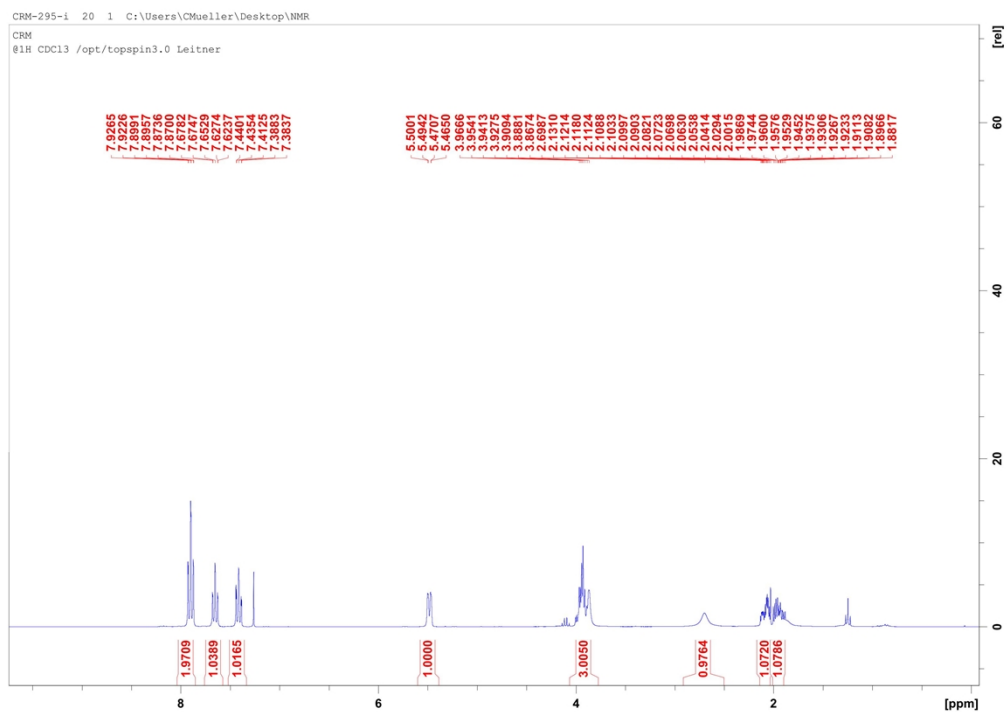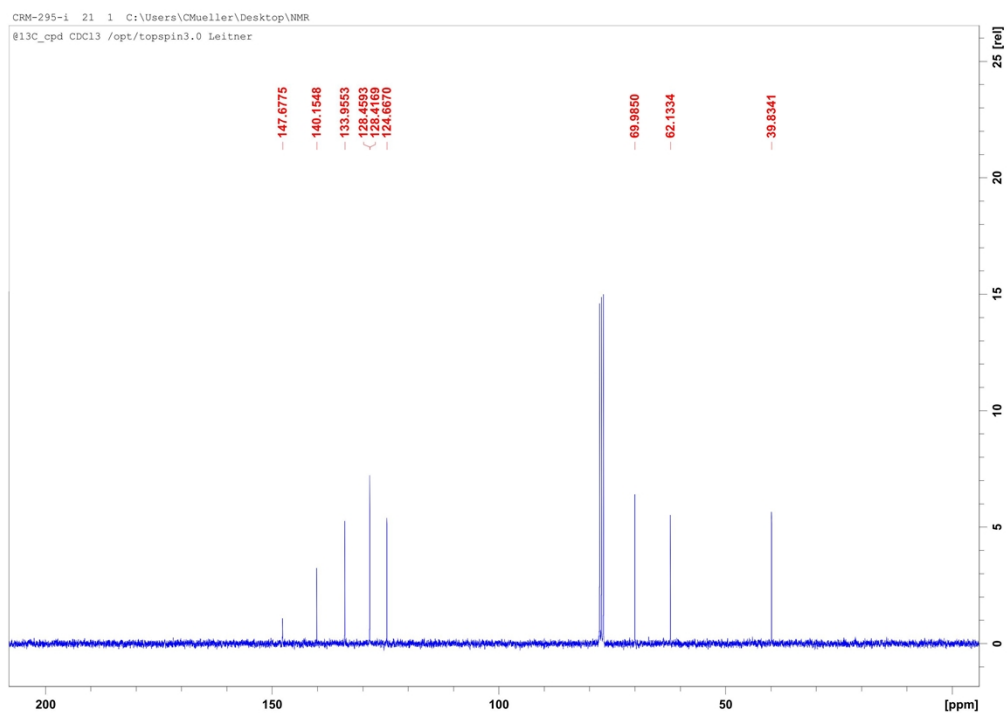

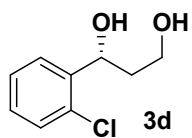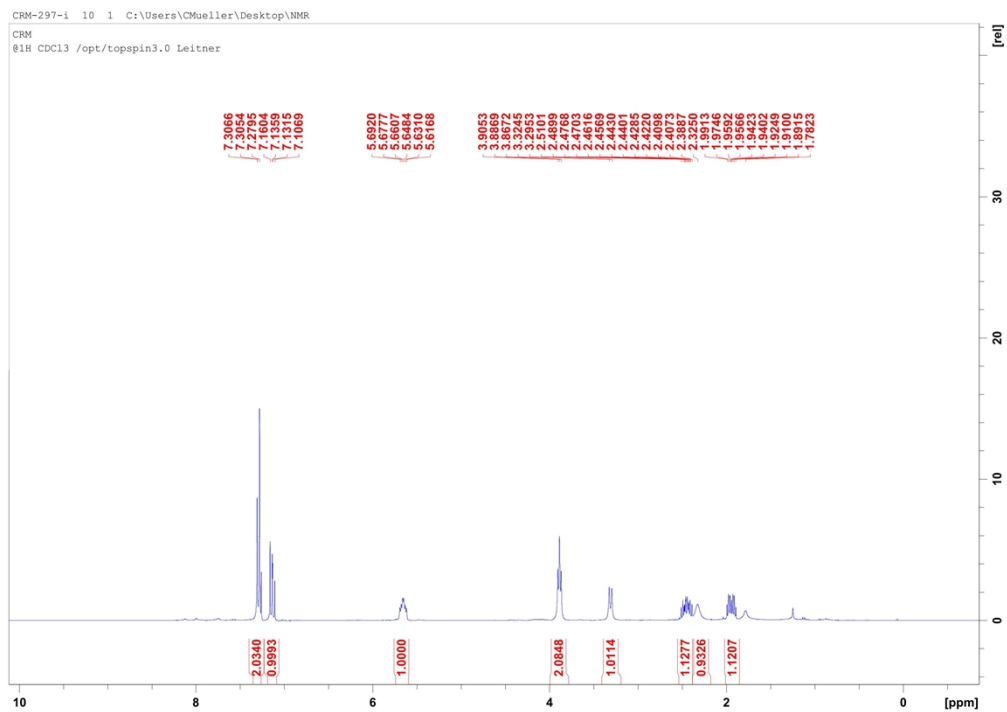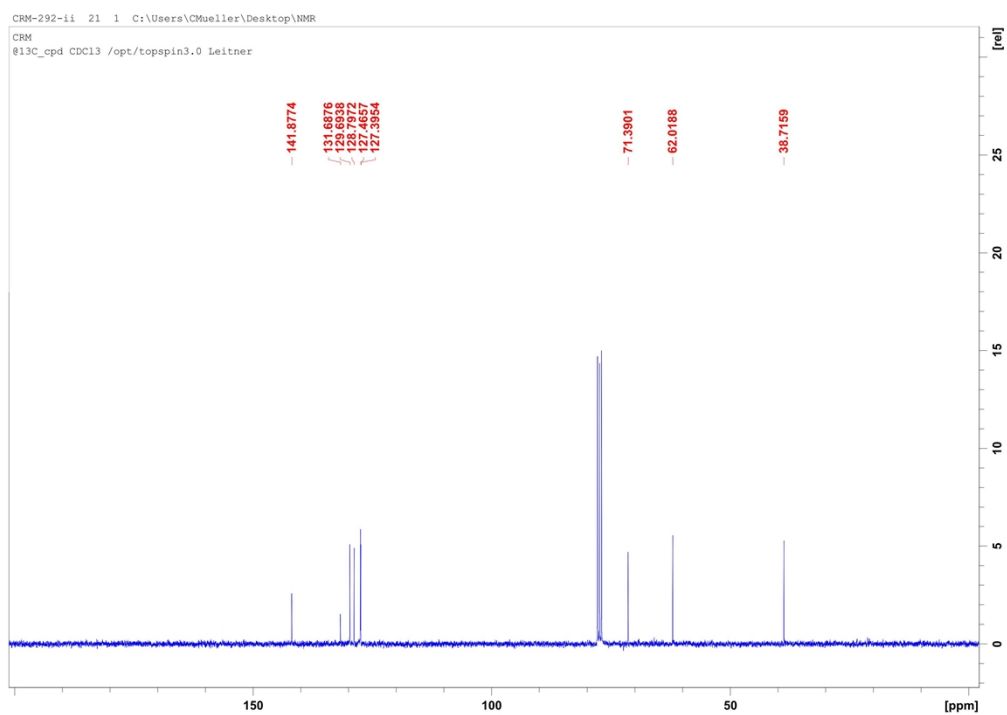

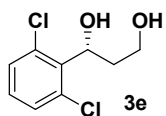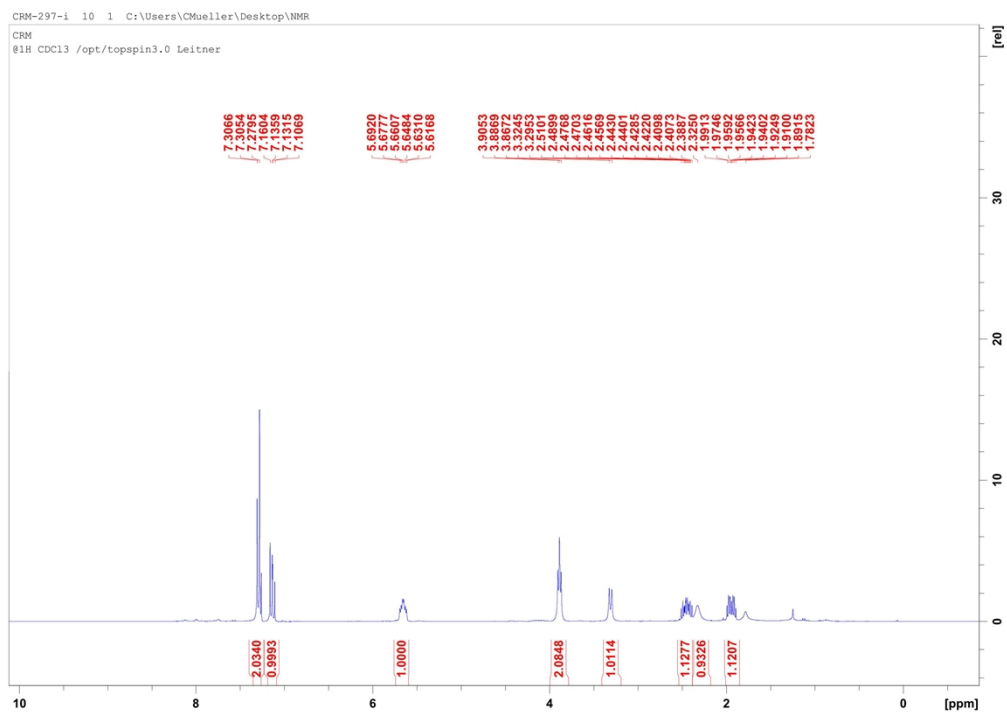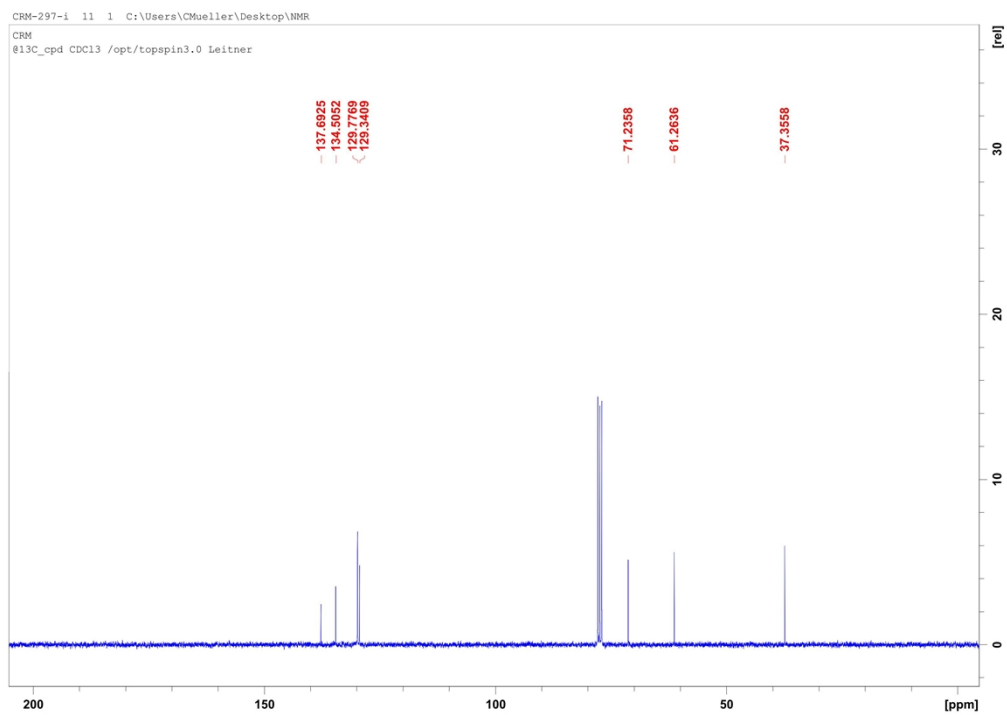

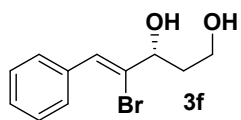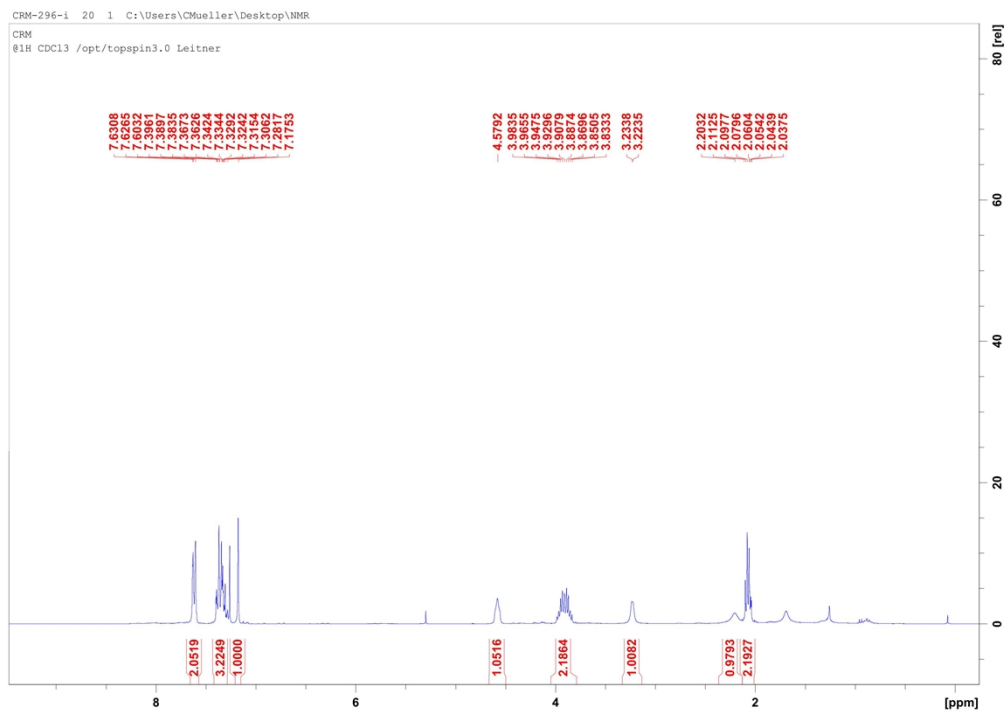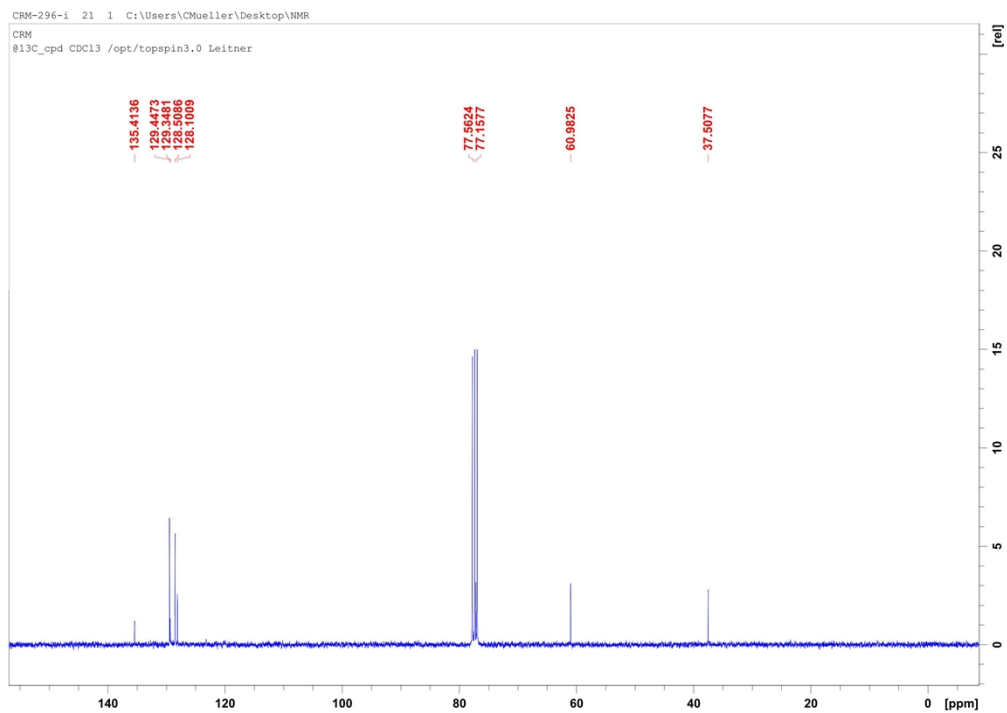

<sup>1</sup> Y. Hayashi, T. Itoh, S. Aratake, H. Ishikawa, *Angew. Chem. Int. Ed.* **2008**, 47 ,



2082-2084.
